# Supplementary material for: 3′-UTR Shortening Contributes to Subtype-Specific Cancer Growth by Breaking Stable ceRNA Crosstalk of Housekeeping Genes
Source: PubMed Central journal article supplement (PMC7201092; doi:10.3389/fbioe.2020.00334), 2020-04-29
Supplement: Image_1.pdf [file Image_1.pdf]

## Supplementary Figures

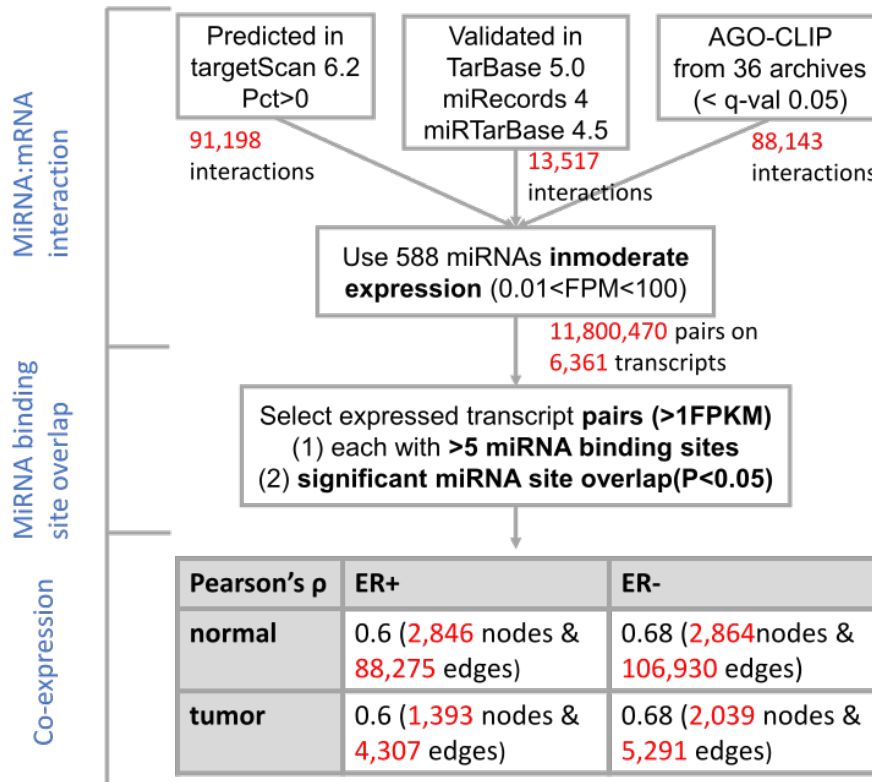

**S. Figure 1.** Workflow for the ceRNA network construction for the TCGA breast tumor and the matched normal samples of ER+ and ER- subtypes

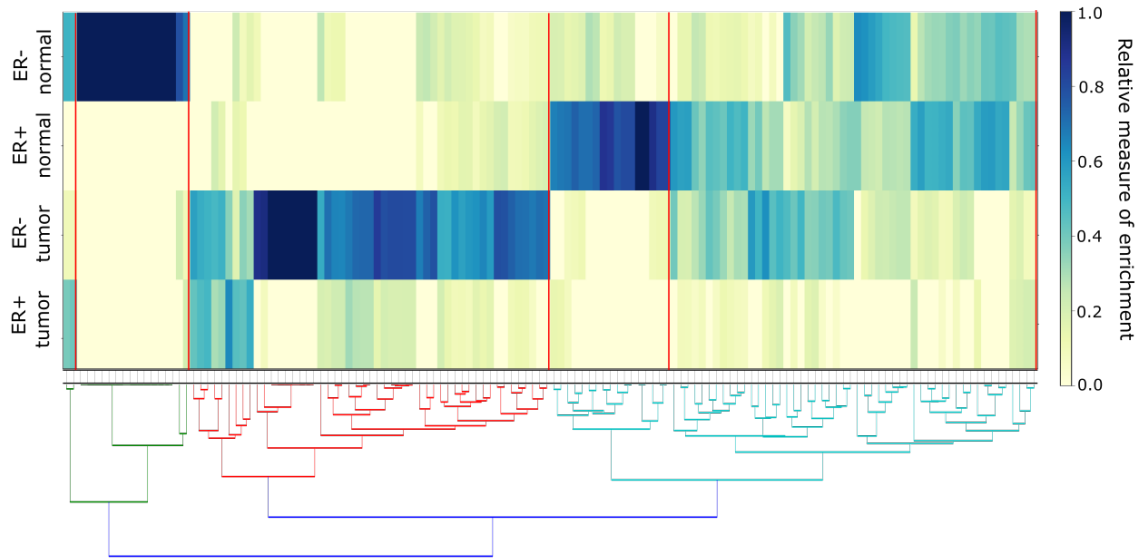

**S. Figure 2.** IPA pathways enriched for the recurrent 3'UL and 3'US genes in ER- and ER+. Colors represent enrichment of each pathway (column) for each class of genes (row). The red lines in the heatmap cut the pathways into 5 clusters in accordance with the dendrogram drawn on the bottom.

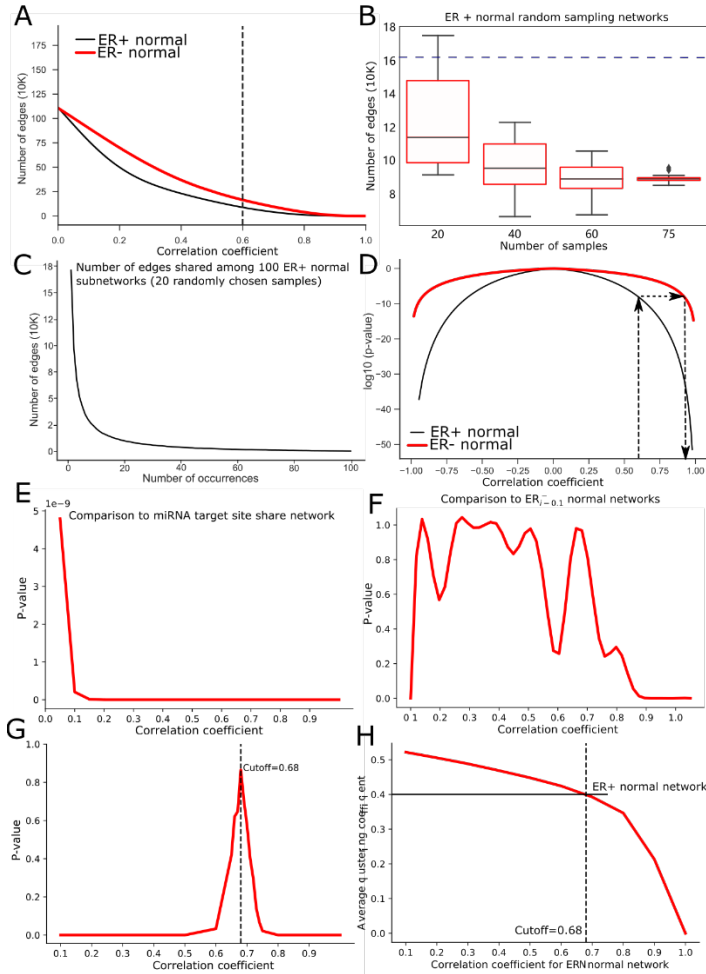

**S. Figure 3.** Two-step Pairwise Normalization of ER+ and ER- ceRNA network. (A) Number of edges in the ceRNA networks by the correlation coefficient cutoff (black and red line for ER+ and ER- normal networks, respectively). (B) Number of edges in 100 networks built from a subset of ER+ normal samples in different size. Blue dotted line indicates the number of edges of ER- normal network whose sample size is 20 (160,687) (C) The number of edges shared among 100 ER+ normal samples, where each of them was built by using 20 randomly chosen samples. (D) Statistical significance (p-value) achievable by using different correlation coefficient cutoff values for ER+ (black) and ER- (red) samples. Statistical significance for a correlation coefficient cutoff value is described in Methods.. (E) Comparison of ER-normal network with the miRNA target site share network to by correlation cutoff value (see Methods). (F) Comparison of ER- normal network with that of the previous correlation cutoff value in the stepwise increase (see Methods). (G). Significance of topological similarity (y-axis) of ER+ normal network with ER- normal ceRNA networks built by different cutoff values (x-axis). The bigger the p-value is, the more similar the two networks are (see Methods)[32]. (H) Comparison of the ER+ normal reference network with ER- normal ceRNA networks built by different correlation cutoff values in the average clustering coefficient..

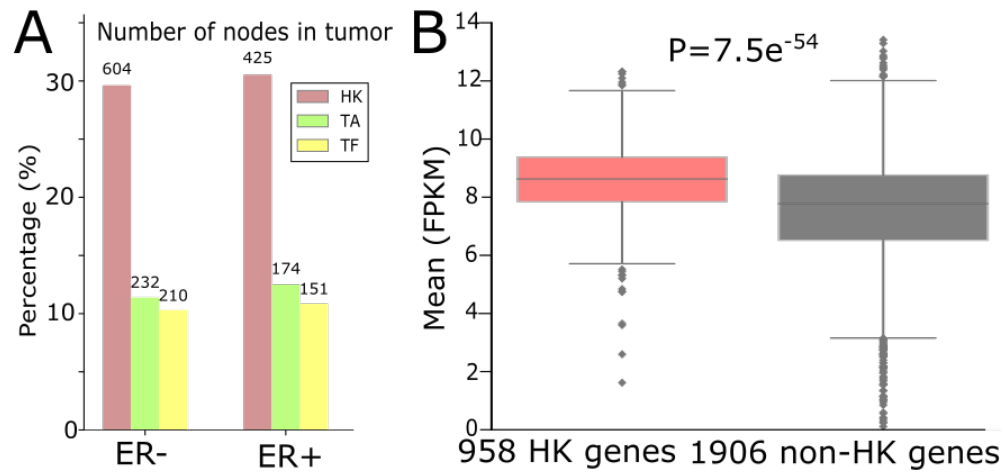

**S. Figure 4.** (A) Number (and the percentage to the total number of nodes in tumor networks) of HK genes and other important classes of genes in ER+ and ER- normal ceRNA networks. (B) Average gene expression values of 958 HK genes and 1,906 non-HK genes in the ER+ and ER- normal samples.
